# Supplementary material
Source: PubMed Central journal article supplement (PMC3766312)
Supplement: 97320630009788S1.pdf [file 97320630009788S1.pdf]

## Supplementary material:

**Table 1:** Interaction properties of compounds found predicted to bind with FSH

| LIGANDS                      | G SCORE | HYDROGEN BONDING | RESIDUES INVOLVED IN H BONDS    |
|------------------------------|---------|------------------|---------------------------------|
| <b>STANDARD LIGANDS</b>      |         |                  |                                 |
| Estradiol                    | -5.4    | -1.2             | GLN 123                         |
| Centchroman                  | -3.8    | 0.0              | LYS 46, TYR 88                  |
| Levonogestral                | -4.2    | -0.9             | LYS 46, GLN 123                 |
| <b>ZINC DATABASE LIGANDS</b> |         |                  |                                 |
| ZINC00193616                 | -9.1    | -1.4             | ASP 36, LYS 46, THR 86          |
| ZINC03294620                 | -9.2    | -1.9             | THR 86, GLN 48, TYR 65, GLN 123 |
| ZINC13598214                 | -8.7    | -1.7             | THR 86, GLN 48, LYS 46, TYR 65  |
| ZINC02497690                 | -6.8    | -1.9             | LYS 46, GLU 77, GLN 123         |

**Table 2:** ADME parameters calculated for the Zinc Database compounds

| Molecule     | CNS | MW<br>(g/mol) | HB    |          | QPlog<br>Po/w | QPlogS | QPPCac<br>o | QPlogBB | % Human<br>Oral<br>Absorption | Rule Of<br>Five |
|--------------|-----|---------------|-------|----------|---------------|--------|-------------|---------|-------------------------------|-----------------|
|              |     |               | Donor | Acceptor |               |        |             |         |                               |                 |
| ZINC00193616 | 0   | 279.341       | 4     | 3.5      | 2.385         | -2.677 | 238.533     | -0.373  | 83.466                        | 0               |
| ZINC03294620 | -2  | 389.41        | 2.25  | 6.25     | 3.317         | -5.521 | 199.795     | -1.568  | 87.545                        | 0               |
| ZINC13598214 | -2  | 350.373       | 1.25  | 6.25     | 3.019         | -4.89  | 337.653     | -1.304  | 89.875                        | 0               |
| ZINC01834978 | 1   | 230.309       | 1     | 2.5      | 2.765         | -2.751 | 365.645     | -0.233  | 89.012                        | 0               |
| ZINC02497690 | 0   | 279.341       | 4     | 3.5      | 2.35          | -2.667 | 208.848     | -0.428  | 82.226                        | 0               |
